# Supplementary material for: GXP: Analyze and Plot Plant Omics Data in Web Browsers
Source: MDPI journal article supplement (doi:10.3390/plants11060745), 2022-03-11
Supplement: s1 [file s1]

# GXP: Analyze and plot plant omics data in web browsers

## Supplemental text S2

### Table of used software packages and frameworks

This supplement provides a summarizing table about software packages, modules, and frameworks used to implement GXP and its functions. The interested reader can thus quickly assess the software dependencies of GXP.

Table S2.1: List of packages, modules, or frameworks used to implement Gene-Expression-Plotter (GXP). The respective entries are listed by order of appearance in the main text.

| Package, module, or framework | Version | Link                                                                                        |
|-------------------------------|---------|---------------------------------------------------------------------------------------------|
| typescript                    | 4.5.2   | <a href="https://www.typescriptlang.org/">https://www.typescriptlang.org/</a>               |
| ReactJS                       | 17.0.1  | <a href="https://reactjs.org/">https://reactjs.org/</a>                                     |
| Chakra UI                     | 1.7.2   | <a href="https://chakra-ui.com/">https://chakra-ui.com/</a>                                 |
| ViteJS                        | 1.3.6   | <a href="https://vitejs.dev/">https://vitejs.dev/</a>                                       |
| MobX                          | 6.3.7   | <a href="https://mobx.js.org/">https://mobx.js.org/</a>                                     |
| plotly.js                     | 2.6.3   | <a href="https://plotly.com/javascript/">https://plotly.com/javascript/</a>                 |
| ml-distance                   | 3.0.0   | <a href="https://github.com/mljs/">https://github.com/mljs/</a>                             |
| ml-hclust                     | 3.1.0   | <a href="https://github.com/mljs/">https://github.com/mljs/</a>                             |
| visx                          | 2.4.0   | <a href="https://github.com/airbnb/visx/">https://github.com/airbnb/visx/</a>               |
| D3                            | 7.1.1   | <a href="https://d3js.org/">https://d3js.org/</a>                                           |
| ml-pca                        | 4.0.2   | <a href="https://github.com/mljs/">https://github.com/mljs/</a>                             |
| MapMan Store                  | X4.3    | <a href="https://mapman.gabipd.org/mapmanstore/">https://mapman.gabipd.org/mapmanstore/</a> |
| GNU Scientific Library        | 2.6     | <a href="git://git.savannah.gnu.org/gsl.git/">git://git.savannah.gnu.org/gsl.git/</a>       |
| web-assembly                  | 1.0     | <a href="https://webassembly.org/">https://webassembly.org/</a>                             |
| emscripten                    | 2.0.25  | <a href="https://emscripten.org/">https://emscripten.org/</a>                               |
